# Supplementary material for: The roles of nucleation and growth kinetics in determining Li metal morphology for Li metal batteries: columnar versus spherical growth
Source: Royal Society of Chemistry journal article supplement (doi:10.1039/d1ta09481e), 2022-01-01
Supplement: d1ta09481e1.pdf [file d1ta09481e1.pdf]

## Supplementary Information

### **The roles of nucleation and growth kinetics in determining Li metal morphology for Li metal batteries: columnar versus spherical growth**

Seunghyeon Jo, Bomee Kwon, Jeongeun Oh, Jeonghyeop Lee, Kyobin Park, and Kyu Tae Lee\*

<sup>a</sup>School of Chemical and Biological Engineering, Institute of Chemical Processes, Seoul National University, 1

Gwanak-ro, Gwanak-gu, Seoul, Republic of Korea

\*corresponding author: [ktlee@snu.ac.kr](mailto:ktlee@snu.ac.kr)

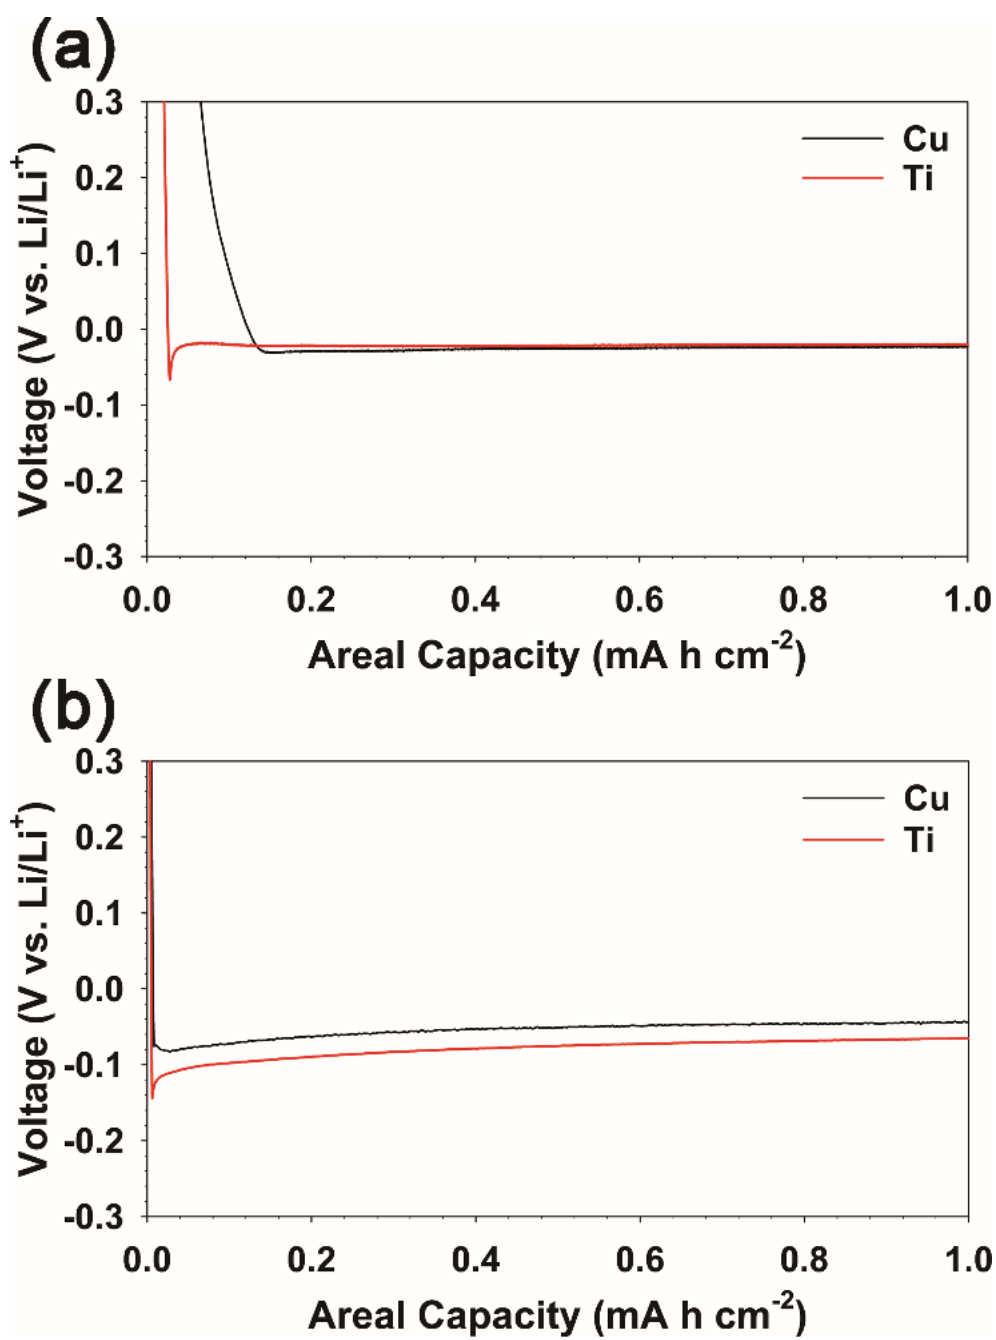

**Fig. S1** Voltage profiles of Cu and Ti substrates during the initial nucleation and growth at a current density of (a) 0.1 mA cm<sup>-2</sup> and (b) 1 mA cm<sup>-2</sup> using three-electrode convective beaker-type cells.

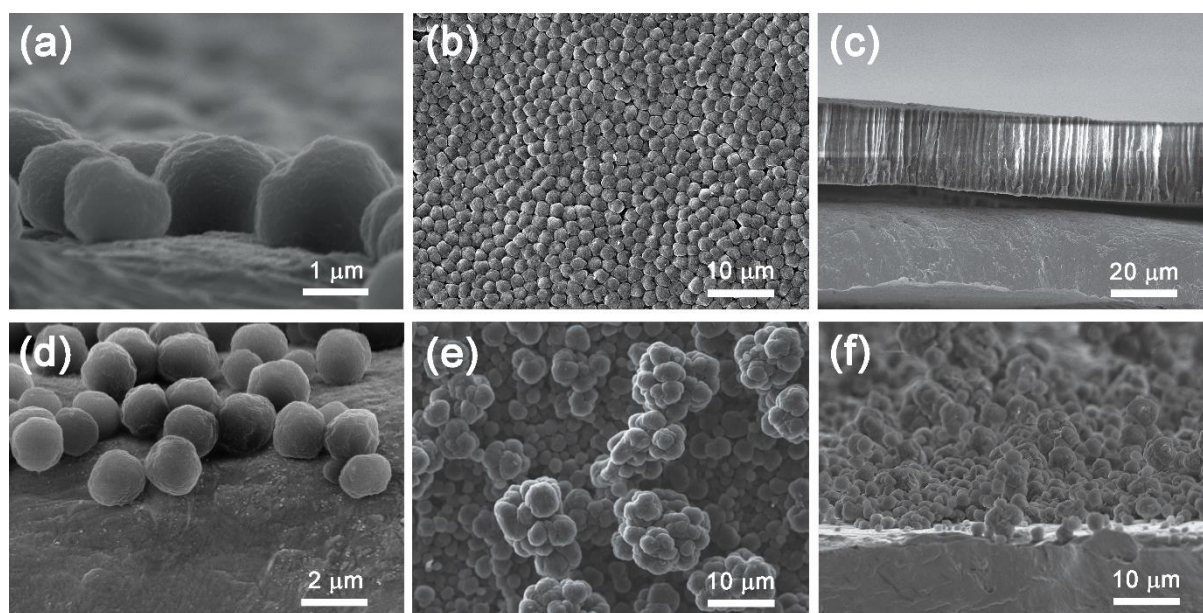

**Fig. S2** SEM images of Li metal grown on the brass substrate for various areal capacities of (a) 0.2 and (b), (c) 6 mA h cm<sup>-2</sup>. SEM images of Li metal grown on the SUS substrate for various areal capacities of (d) 0.2, (e), (f) 4 mA h cm<sup>-2</sup>. (a, c, d, and f) Cross-sectional and (b and e) top-view SEM images. Electroplating was performed using LiPF<sub>6</sub> in EC/DEC at a current density of 0.1 mA cm<sup>-2</sup>.

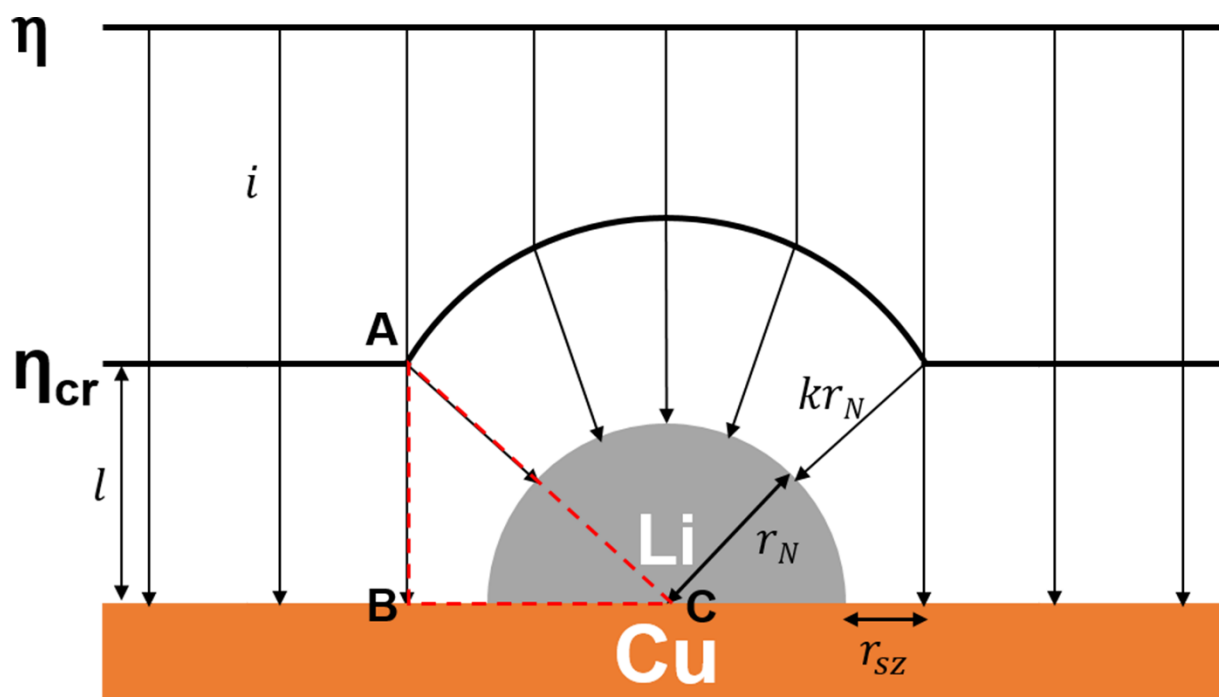

Fig. S3 Schematic illustration of current distribution during nucleation.<sup>1</sup>

At the end of nucleation exclusion zone,  $l = kr$ .

$$\overline{AB} = l = kr_N$$

$$\overline{AC} = r_N$$

$$\overline{BC} = \sqrt{\overline{AC}^2 - \overline{AB}^2} = r_N \sqrt{2k + 1}$$

$$r_{sz} = r_N (\sqrt{2k + 1} - 1)$$

$$r_{sz} = r_N \left( \sqrt{\frac{2l}{r_N} + 1} - 1 \right)$$

$$\rho il = \eta_{cr}$$

$$r_{sz} = r_N \left( \sqrt{\frac{2\eta_{cr}}{r_N \rho i} + 1} - 1 \right)$$

## References

- 1 S. Štrbac, Z. Rakočević, K. I. Popov, M.G. Pavlović and R. Petrović, *J. Serb. Chem. Soc.*, 1999, **64**, 483-493.

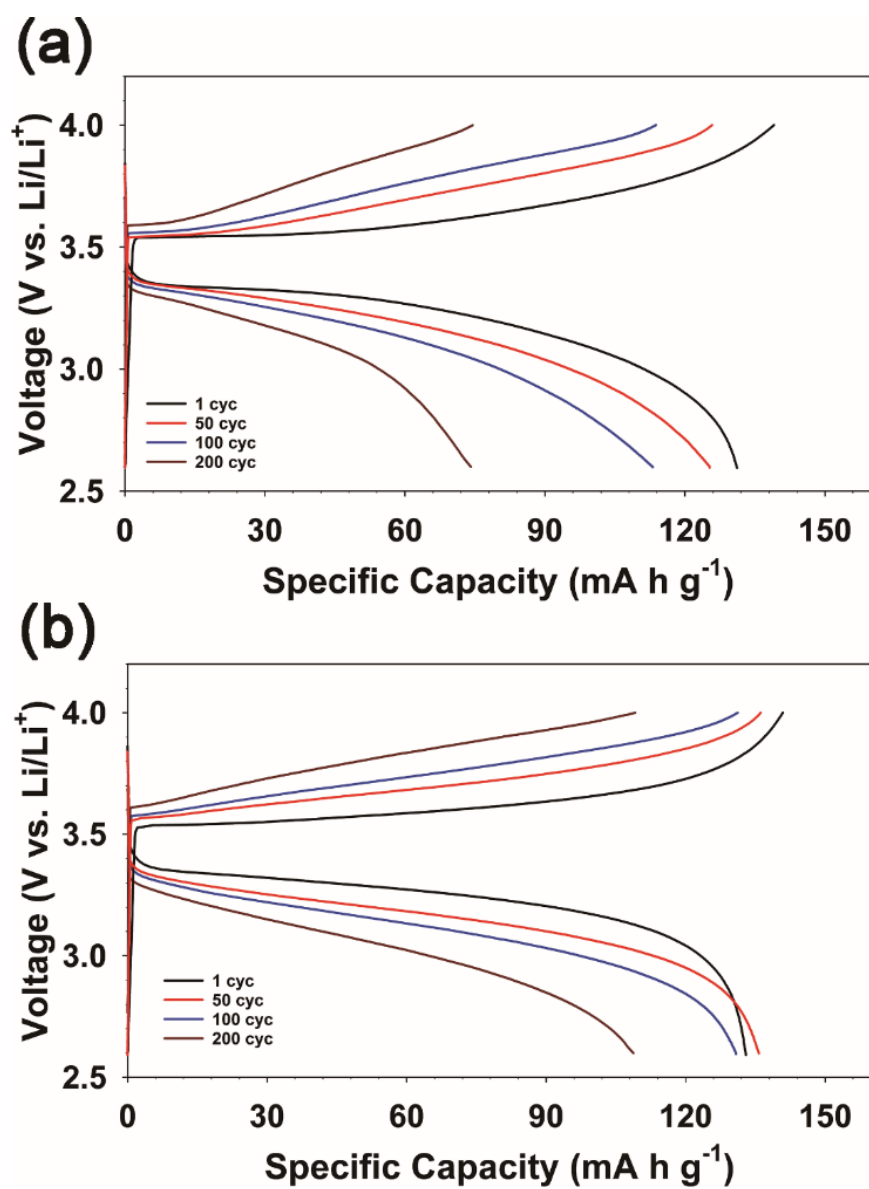

**Fig. S4** Voltage profiles of the Li (20  $\mu\text{m}$ ) | LiFePO<sub>4</sub> full cells using (a) conventional and (b) columnar Li metal electrodes at a 1 C rate for various cycle numbers.

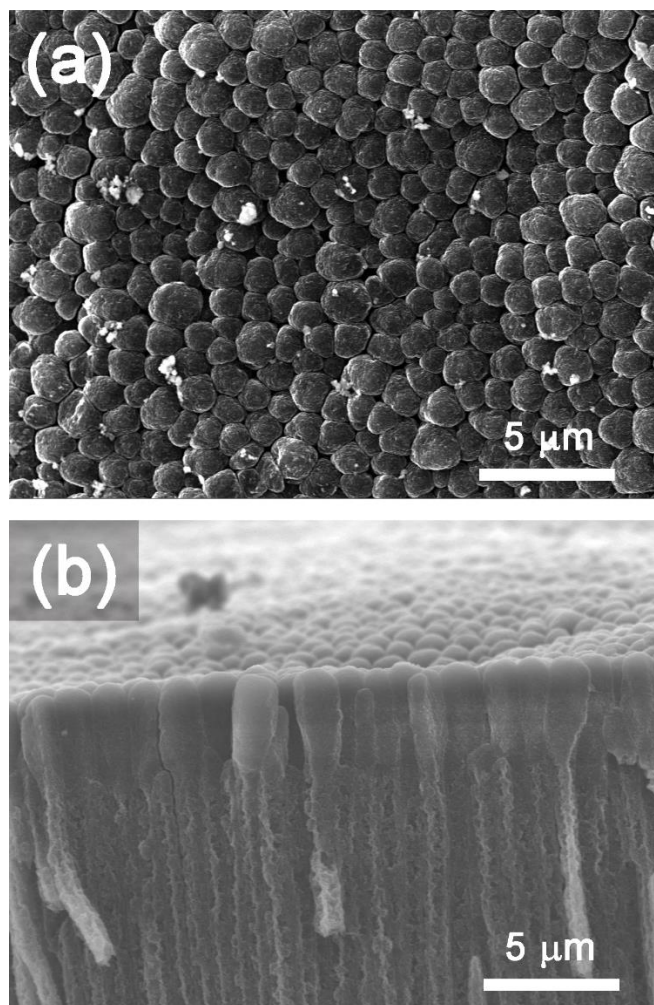

**Fig. S5** (a) Top-view and (b) cross-sectional SEM images of the initially stripped columnar Li metal after the subsequent electroplating. Columnar Li metal was initially stripped at a current density of  $0.1 \text{ mA cm}^{-2}$  for the areal capacity of  $2 \text{ mA h cm}^{-2}$ . The stripped columnar Li metal was then electroplated at a current density of  $0.1 \text{ mA cm}^{-2}$  for the areal capacity of  $2 \text{ mA h cm}^{-2}$ . Stripping and electroplating were performed using convective beaker-type cells.

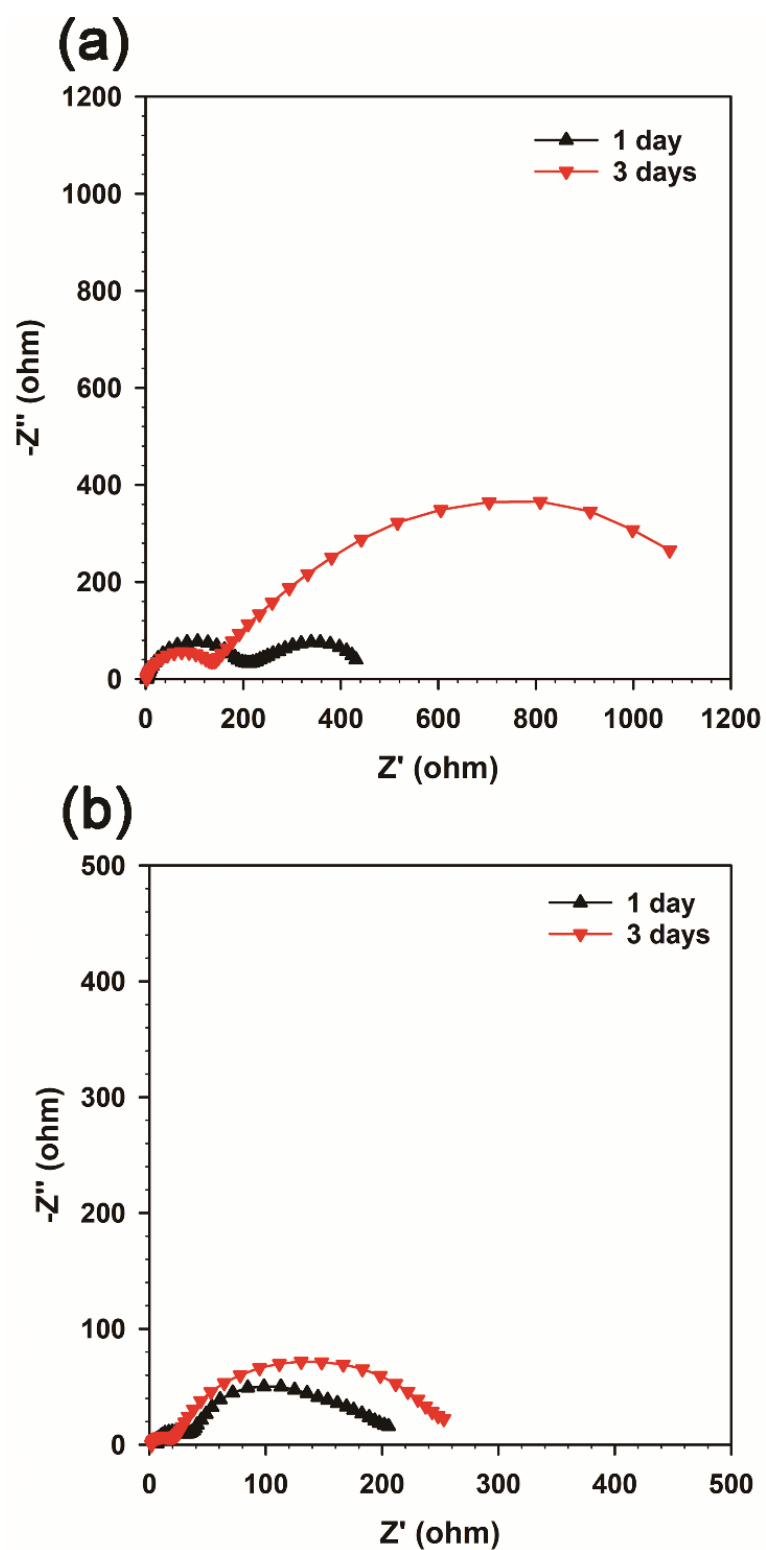

**Fig. S6** Changes in the Nyquist plots of the Li/Li symmetric cells containing 1 M LiTFSI in DOL/DME with 1 wt% LiNO<sub>3</sub> for (a) conventional Li metal and (b) columnar Li metal during various aging periods. Both Li metal electrodes were 20  $\mu\text{m}$  in thickness.

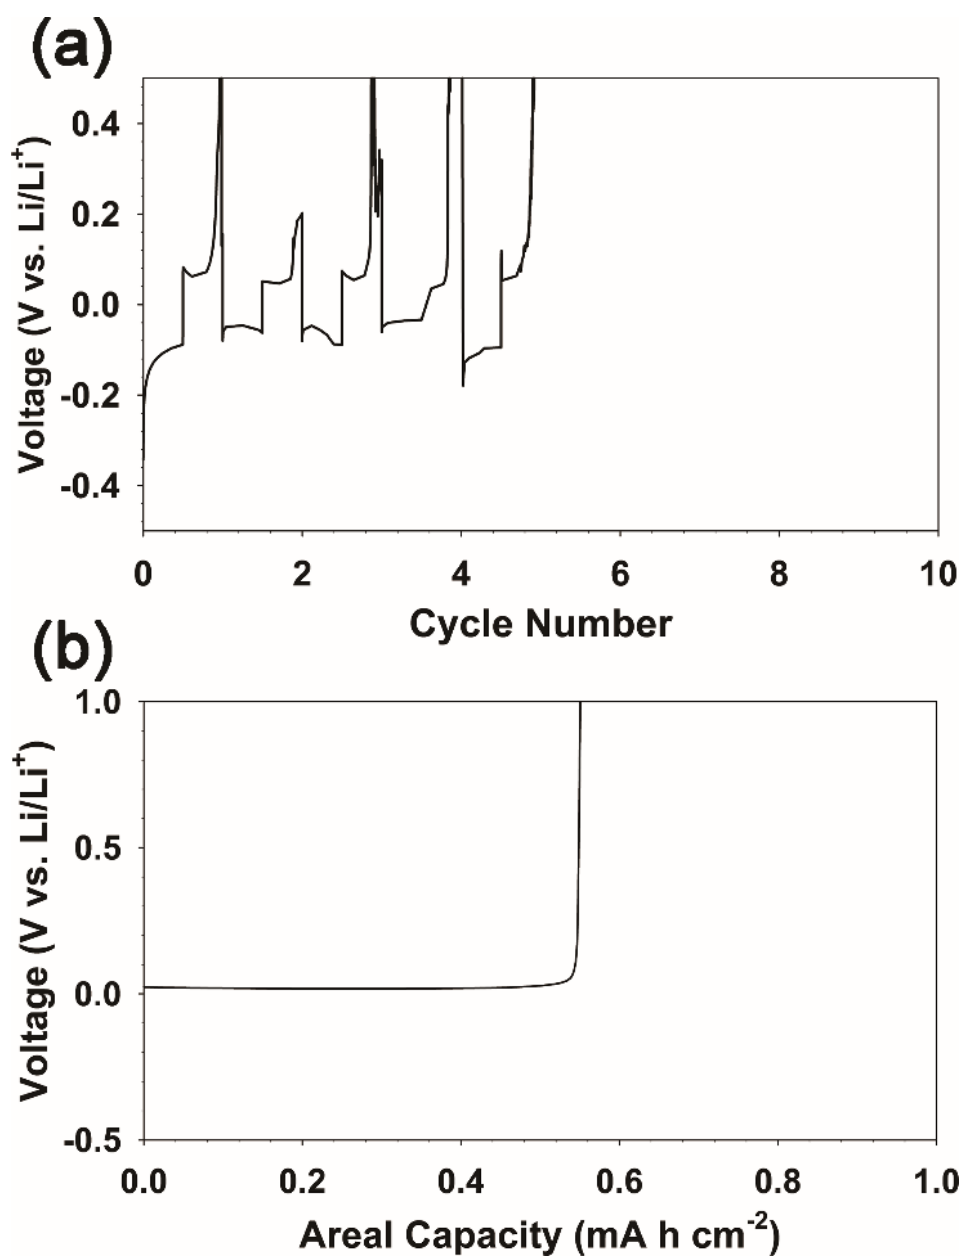

**Fig. S7** (a) Voltage profile of the multilayers of Li metal spheres using the asymmetric cell of Li (Li metal spheres) | Li (conventional Li foil, 700  $\mu\text{m}$ ) at a current density of 5 mA cm<sup>-2</sup> with the areal capacity of 1 mA h cm<sup>-2</sup>. (b) Voltage profile of the multilayers of Li metal spheres for complete stripping at 0.1 mA cm<sup>-2</sup>. The multilayers of Li metal spheres electrodes were fabricated using the same electroplating condition as Fig. 1f.
